# Supplementary material for: Atmospheric moisture tracking with WAM2layers v3
Source: Copernicus journal article supplement (doi:10.5194/gmd-18-4335-2025), 2025-07-18
Supplement: Supplementary file 1 [file gmd-18-4335-2025-supplement.zip]

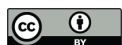

*Supplement of*

## **Atmospheric moisture tracking with WAM2layers v3**

**Peter Kalverla et al.**

*Correspondence to:* Peter Kalverla (p.kalverla@esciencecenter.nl) and Ruud J. van der Ent (r.j.vanderent@tudelft.nl)

- gmd-18-4335-2025-supplement-title-page.pdf
- WAM2layers primary - essential info.xlsx

The copyright of individual parts of the supplement might differ from the article licence.
