# Supplementary material for: Atmospheric moisture tracking with WAM2layers v3
Source: Copernicus journal article supplement (doi:10.5194/gmd-18-4335-2025), 2025-07-18
Supplement: Supplementary file 1 [file gmd-18-4335-2025-supplement.zip]

## Sheet: WAM2layers primary
Publication Year	Author	Title	Publication Title	DOI	Extra
2024	Bedoya‐Soto, J. M.; Poveda, G.	Moisture Recycling in the Colombian Andes	Water Resources Research	10.1029/2022WR033601	ERA5
2019	Zhang, Chi; Tang, Qiuhong; Chen, Deliang; Van der Ent, Ruud J; Liu, Xingcai; Li, Wenhong; Haile, Gebremedhin Gebremeskel	Moisture source changes contributed to different precipitation changes over the northern and southern Tibetan Plateau	Journal of Hydrometeorology	10.1175/JHM-D-18-0094.1	ERA-Interim
2013	Van der Ent, RJ; Tuinenburg, OA; Knoche, H-R; Kunstmann, Harald; Savenije, HHG	Should we use a simple or complex model for moisture recycling and atmospheric moisture tracking?	Hydrology and Earth System Sciences	10.5194/hess-17-4869-2013	Climate Model
2012	Keys, Patrick W; Van der Ent, RJ; Gordon, Line J; Hoff, Holger; Nikoli, R; Savenije, HHG	Analyzing precipitationsheds to understand the vulnerability of rainfall dependent regions	Biogeosciences	10.5194/bg-9-733-2012	ERA-Interim
2016	Zhao, Tongtiegang; Zhao, Jianshi; Hu, Hongchang; Ni, Guangheng	Source of atmospheric moisture and precipitation over China’s major river basins	Frontiers of Earth Science	10.1007/s11707-015-0497-4	ERA-Interim
2020	Zhang, Y.; Huang, W.; Zhang, M.; Tian, Y.; Wang, G.; Zhong, D.	Atmospheric Basins: Identification of Quasi-Independent Spatial Patterns in the Global Atmospheric Hydrological Cycle Via a Complex Network Approach	Journal of Geophysical Research: Atmospheres	10.1029/2020JD032796	ERA-Interim; MERRA-2
2023	Zhang, Xingxing; Liu, Zhaofei; Liu, Yubo; Jiang, Liguang; Wang, Rui; Jiang, Hou; Li, Jing; Tang, Qiuhong; Yao, Zhijun	Examining moisture contribution for precipitation in response to climate change and anthropogenic factors in Hengduan Mountain Region, China	Journal of Hydrology	10.1016/j.jhydrol.2023.129562	ERA5
2023	Zhang, Chi; Chen, Deliang; Tang, Qiuhong; Huang, Jinchuan	Fate and Changes in Moisture Evaporated From the Tibetan Plateau (2000–2020)	Water Resources Research	10.1029/2022WR034165	ERA5
2020	Zhang, Chi	Moisture source assessment and the varying characteristics for the Tibetan Plateau precipitation using TRMM	Environmental Research Letters	10.1088/1748-9326/abac78	ERA-Interim
2020	Zhang, C.	Moisture sources for precipitation in Southwest China in summer and the changes during the extreme droughts of 2006 and 2011	Journal of Hydrology	10.1016/j.jhydrol.2020.125333	ERA-Interim
2023	Zhang, B.; He, Y.; Ren, Y.; Huang, B.; Peng, Y.; Wang, S.; Guan, X.	The influence of the precipitation recycling process on the shift to heavy precipitation over the Tibetan Plateau in the summer	Frontiers in Earth Science	10.3389/feart.2023.1078501	ERA5
2014	Zemp, DC; Schleussner, C-F; Barbosa, HMJ; Van der Ent, RJ; Donges, Jonathan F; Heinke, J; Sampaio, G; Rammig, A	On the importance of cascading moisture recycling in South America	Atmospheric Chemistry and Physics	10.5194/acp-14-13337-2014	ERA-Interim
2023	Yuan, Xu; Yang, Kun; Sun, Jing; Wang, Yan; He, Yan-Yi; Zou, Mi-Jun; Jiang, Yao-Zhi	Why was Pakistan extreme precipitation stronger in 2022 than in 2010?	Advances in Climate Change Research	10.1016/j.accre.2023.11.016	ERA5
2021	Xiao, Mingzhong; Cui, Yuanzheng	Source of Evaporation for the Seasonal Precipitation in the Pearl River Delta, China	Water Resources Research	10.1029/2020WR028564	ERA5
2022	Xia, Zhengyu; Welker, Jeffrey M.; Winnick, Matthew J.	The Seasonality of Deuterium Excess in Non‐Polar Precipitation	Global Biogeochemical Cycles	10.1029/2021GB007245	ERA5
2018	Wang-Erlandsson, Lan; Fetzer, Ingo; Keys, Patrick W; Van Der Ent, Ruud J; Savenije, Hubert HG; Gordon, Line J	Remote land use impacts on river flows through atmospheric teleconnections	Hydrology and Earth System Sciences	10.5194/hess-22-4311-2018	ERA-Interim
2012	Van der Ent, Ruud J; Coenders-Gerrits, A Miriam J; Nikoli, Revekka; Savenije, Hubert HG	The importance of proper hydrology in the forest cover-water yield debate: commentary on Ellison et al.(2012) Global Change Biology, 18, 806-820.	Global Change Biology	10.1111/j.1365-2486.2012.02703.x	ERA-Interim
2010	Van der Ent, Rudi J; Savenije, Hubert HG; Schaefli, Bettina; Steele-Dunne, Susan C	Origin and fate of atmospheric moisture over continents	Water Resources Research	10.1029/2010WR009127	ERA-Interim
2013	Van der Ent, Rudi J; Savenije, Hubert HG	Oceanic sources of continental precipitation and the correlation with sea surface temperature	Water Resources Research	10.1002/wrcr.20296	ERA-Interim
2014	Van der Ent, RJ; Wang-Erlandsson, Lan; Keys, Patrick W; Savenije, HHG	Contrasting roles of interception and transpiration in the hydrological cycle–Part 2: Moisture recycling	Earth System Dynamics	10.5194/esd-5-471-2014	ERA-Interim
2017	Van der Ent, R.J.; Tuinenburg, O.A.	The residence time of water in the atmosphere revisited	Hydrology and Earth System Sciences	10.5194/hess-21-779-2017	ERA-Interim
2022	Pranindita, A.; Wang-Erlandsson, L.; Fetzer, I.; Teuling, A.J.	Moisture recycling and the potential role of forests as moisture source during European heatwaves	Climate Dynamics	10.1007/s00382-021-05921-7	ERA-Interim
2023	Posada‐Marín, José A.; Arias, Paola A.; Jaramillo, Fernando; Salazar, Juan F.	Global Impacts of El Niño on Terrestrial Moisture Recycling	Geophysical Research Letters	10.1029/2023GL103147	ERA-Interim
2021	Liu, Yubo; Zhang, Chi; Tang, Qiuhong; Hosseini-Moghari, Seyed-Mohammad; Haile, Gebremedhin Gebremeskel; Li, Laifang; Li, Wenhong; Yang, Kun; van der Ent, Ruud J; Chen, Deliang	Moisture source variations for summer rainfall in different intensity classes over Huaihe River Valley, China	Climate Dynamics	10.1007/s00382-021-05762-4	ERA-Interim
2024	Liu, X.; Guo, C.; Zhang, J.; Liu, Y.; Xiao, M.; Wu, Y.; Li, B.; Zhao, T.	Moisture sources of precipitation over the Pearl River Basin in South China	International Journal of Climatology	10.1002/joc.8447	ERA5
2020	Link, A.; Van Der Ent, R.; Berger, M.; Eisner, S.; Finkbeiner, M.	The fate of land evaporation - A global dataset	Earth System Science Data	10.5194/essd-12-1897-2020	ERA-Interim
2021	Li, Ying; Wang, Chenghao; Peng, Hui; Xiao, Shangbin; Yan, Denghua	Contribution of moisture sources to precipitation changes in the Three Gorges Reservoir Region	Hydrology and Earth System Sciences	10.5194/hess-25-4759-2021	ERA-Interim
2022	Li, Y.; Wang, C.; Huang, R.; Yan, D.; Peng, H.; Xiao, S.	Spatial distribution of oceanic moisture contributions to precipitation over the Tibetan Plateau	Hydrology and Earth System Sciences	10.5194/hess-26-6413-2022	ERA-Interim; MERRA-2; JRA-55
2018	Keys, Patrick W.; Wang-Erlandsson, Lan; Gordon, Line J.	Megacity precipitationsheds reveal tele-connected water security challenges	PLOS ONE	10.1371/journal.pone.0194311	ERA-Interim
2017	Keys, Patrick W.; Wang-Erlandsson, Lan; Gordon, Line J.; Galaz, Victor; Ebbesson, Jonas	Approaching moisture recycling governance	Global Environmental Change	10.1016/j.gloenvcha.2017.04.007	ERA-Interim
2016	Keys, Patrick W.; Wang-Erlandsson, Lan; Gordon, Line J.	Revealing Invisible Water: Moisture Recycling as an Ecosystem Service	PLOS ONE	10.1371/journal.pone.0151993	ERA-Interim
2024	Keys, Patrick W.; Collins, Pamela M.; Chaplin-Kramer, Rebecca; Wang-Erlandsson, Lan	Atmospheric water recycling an essential feature of critical natural asset stewardship	Global Sustainability	10.1017/sus.2023.24	ERA-Interim
2022	Keys, P.W.; Warrier, R.; Van Der Ent, R.J.; Galvin, K.A.; Boone, R.B.	Analysis of Kenya’s Atmospheric Moisture Sources and Sinks	Earth Interactions	10.1175/EI-D-21-0016.1	MERRA-2
2018	Keys, P.W.; Wang-Erlandsson, L.	On the social dynamics of moisture recycling	Earth System Dynamics	10.5194/esd-9-829-2018	ERA-Interim
2014	Keys, P.W.; Barnes, E.A.; Van Der Ent, R.J.; Gordon, L.J.	Variability of moisture recycling using a precipitationshed framework	Hydrology and Earth System Sciences	10.5194/hess-18-3937-2014	ERA-Interim; MERRA
2020	Guo, L.; Van Der Ent, R.J.; Klingaman, N.P.; Demory, M.-E.; Vidale, P.L.; Turner, A.G.; Stephan, C.C.; Chevuturi, A.	Effects of horizontal resolution and air-sea coupling on simulated moisture source for East Asian precipitation in MetUM GA6/GC2	Geoscientific Model Development	10.5194/gmd-13-6011-2020	ERA-Interim; Climate Model
2019	Guo, L.; Van Der Ent, R.J.; Klingaman, N.P.; Demory, M.-E.; Vidale, P.L.; Turner, A.G.; Stephan, C.C.; Chevuturi, A.	Moisture sources for East Asian precipitation: Mean seasonal cycle and interannual variability	Journal of Hydrometeorology	10.1175/JHM-D-18-0188.1	ERA-Interim
2024	Franco-Díaz, Armenia; Klingaman, Nicholas P.; Turner, Andrew G.; Dong, Buwen; Guo, Liang	Effect of global and regional SST biases on the East Asian Summer Monsoon in the MetUM GA7 and GC3 configurations	Climate Dynamics	10.1007/s00382-023-06954-w	ERA5; Climate Model
2019	Findell, Kirsten L; Keys, Patrick W; Van Der Ent, Ruud J; Lintner, Benjamin R; Berg, Alexis; Krasting, John P	Rising temperatures increase importance of oceanic evaporation as a source for continental precipitation	Journal of Climate	10.1175/JCLI-D-19-0145.1	Climate Model
2016	Duerinck, H.M.; van der Ent, R.J.; van de Giesen, N.C.; Schoups, G.; Babovic, V.; Yeh, P.J.-F.	Observed soil moisture-precipitation feedback in Illinois: A systematic analysis over different scales	Journal of Hydrometeorology	10.1175/JHM-D-15-0032.1	ERA-Interim
2024	De Hertog, Steven J; Lopez Fabara, Carmen E; van der Ent, Ruud; Keune, Jessica; Miralles, Diego G; Portmann, Raphael; Schemm, Sebastian; Havermann, Felix; Guo, Suqi; Luo, Fei; others	Effects of idealised land cover and land management changes on the atmospheric water cycle	Earth System Dynamics	10.5194/esd-15-265-2024	Climate Model
2023	Chen, J.; Li, Y.; Xiong, B.; Wang, Y.; Zhou, S.; Huang, Y.	Comparison of moisture sources of summer precipitation in 1998 and 2020 in the middle and lower reaches of Yangtze River basin	International Journal of Climatology	10.1002/joc.8040	ERA5
2020	Bosmans, JHC; Van der Ent, RJ; Haarsma, RJ; Drijfhout, SS; Hilgen, FJ	Precession-and obliquity-induced changes in moisture sources for enhanced precipitation over the Mediterranean Sea	Paleoceanography and Paleoclimatology	10.1029/2019PA003655	Climate Model
2020	Benedict, Imme; Van Heerwaarden, Chiel C; Van Der Ent, Ruud J; Weerts, Albrecht H; Hazeleger, Wilco	Decline in terrestrial moisture sources of the mississippi river basin in a future climate	Journal of Hydrometeorology	10.1175/JHM-D-19-0094.1	Climate Model
2021	Benedict, I.; van Heerwaarden, C.C.; van der Linden, E.C.; Weerts, A.H.; Hazeleger, W.	Anomalous moisture sources of the Rhine basin during the extremely dry summers of 2003 and 2018	Weather and Climate Extremes	10.1016/j.wace.2020.100302	ERA5
2024	Zhang, Chi; Tang, Qiuhong; Zhao, Yang; Chen, Deliang; Huang, Jinchuan; Liu, Yubo; Zhang, Xu	Moisture source differences between the 2020 and 1998 super Meiyu-flood events in the Yangtze River Valley	Weather and Climate Extremes	10.1016/j.wace.2024.100644	ERA5
2024	Liu, Yubo; Tang, Qiuhong; Zhang, Chi; Chen, Deliang; Francis, Jennifer A.; Leung, L. Ruby; Chen, Hans W.	The disproportionate impact of enhanced evaporation from melting arctic sea ice on cold-season land precipitation trends	npj Climate and Atmospheric Science	10.1038/s41612-024-00680-8	ERA5
2024	Carr, Theo; Ummenhofer, Caroline C.	Impact of Atmospheric Circulation Variability on U.S. Midwest Moisture Sources	Journal of Climate	10.1175/JCLI-D-23-0178.1	ERA5
2023	Yuan, Xu; Yang, Kun; Lu, Hui; Sun, Jing; Wang, Yan; Liu, Yubo; Tang, Qiuhong	Weakened Subtropical Westerlies Reduced Early Spring Precipitation in the Southeast Tibetan Plateau	Journal of Climate	10.1175/JCLI-D-22-0770.1	ERA5
2023	Mu, Ye; Biggs, Trent W.; Jones, Charles	Importance in Shifting Circulation Patterns for Dry Season Moisture Sources in the Brazilian Amazon	Geophysical Research Letters	10.1029/2023GL103167	ERA5
2022	Shi, Kaifang; Li, Tiejian; Zhao, Jie; Su, Yang; Gao, Jian; Li, Jiaye	Atmospheric recycling of agricultural evapotranspiration in the Tarim Basin	Frontiers in Earth Science	10.3389/feart.2022.950299	ERA5
2022	Lobos-Roco, Felipe; Hartogensis, Oscar; Suárez, Francisco; Huerta-Viso, Ariadna; Benedict, Imme; De La Fuente, Alberto; Vilà-Guerau De Arellano, Jordi	Multi-scale temporal analysis of evaporation on a saline lake in the Atacama Desert	Hydrology and Earth System Sciences	10.5194/hess-26-3709-2022	ERA-Interim
2022	Liu, Yubo; Garcia, Monica; Zhang, Chi; Tang, Qiuhong	Recent decrease in summer precipitation over the Iberian Peninsula closely links to reduction in local moisture recycling	Hydrology and Earth System Sciences	10.5194/hess-26-1925-2022	ERA5
2022	Enciso, Angelica M.; Baquero, Olga Lucia; Escobar-Carbonari, Daniel; Tapasco, Jeimar; Cerón, Wilmar L.	Variability of Precipitation Recycling and Moisture Sources over the Colombian Pacific Region: A Precipitationshed Approach	Atmosphere	10.3390/atmos13081202	ERA-Interim
2021	Mu, Ye; Biggs, Trent W.; De Sales, Fernando	Forests Mitigate Drought in an Agricultural Region of the Brazilian Amazon: Atmospheric Moisture Tracking to Identify Critical Source Areas	Geophysical Research Letters	10.1029/2020GL091380	ERA-Interim
2021	Cluett, A. A.; Thomas, E. K.; Evans, S. M.; Keys, P. W.	Seasonal Variations in Moisture Origin Explain Spatial Contrast in Precipitation Isotope Seasonality on Coastal Western Greenland	Journal of Geophysical Research: Atmospheres	10.1029/2020JD033543	ERA-Interim
2020	Ampuero, A.; Stríkis, N. M.; Apaéstegui, J.; Vuille, M.; Novello, V. F.; Espinoza, J. C.; Cruz, F. W.; Vonhof, H.; Mayta, V. C.; Martins, V. T. S.; Cordeiro, R. C.; Azevedo, V.; Sifeddine, A.	The Forest Effects on the Isotopic Composition of Rainfall in the Northwestern Amazon Basin	Journal of Geophysical Research: Atmospheres	10.1029/2019JD031445	ERA-Interim
2017	Zemp, Delphine Clara; Schleussner, Carl-Friedrich; Barbosa, Henrique M. J.; Hirota, Marina; Montade, Vincent; Sampaio, Gilvan; Staal, Arie; Wang-Erlandsson, Lan; Rammig, Anja	Self-amplified Amazon forest loss due to vegetation-atmosphere feedbacks	Nature Communications	10.1038/ncomms14681	ERA-Interim
2017	Li, Jia; Liu, Dan; Wang, Tao; Li, Yingnian; Wang, Shiping; Yang, Yuting; Wang, Xiaoyi; Guo, Hui; Peng, Shushi; Ding, Jinzhi; Shen, Miaogen; Wang, Lei	Grassland restoration reduces water yield in the headstream region of Yangtze River	Scientific Reports	10.1038/s41598-017-02413-9	ERA-Interim
2024	Posada-Marín, José; Salazar, Juan; Rulli, Maria Cristina; Wang-Erlandsson, Lan; Jaramillo, Fernando	Upwind moisture supply increases risk to water security	Nature Water	10.1038/s44221-024-00291-w	ERA-Interim
2024	Zhou, Keke; Shi, Xiaogang	Understanding Precipitation Moisture Sources and Their Dominant Factors During Droughts in the Vietnamese Mekong Delta	Water Resources Research	10.1029/2023WR035920	ERA5
2024	Li, Ying; Wang, Chenghao; Tang, Qiuhong; Yao, Shibo; Sun, Bo; Peng, Hui; Xiao, Shangbin	Unraveling the discrepancies between Eulerian and Lagrangian moisture tracking models in monsoon- and westerly-dominated basins of the Tibetan Plateau	Atmospheric Chemistry and Physics	10.5194/acp-24-10741-2024	ERA5
